# Supplementary material for: Jagged Ligands Enhance the Pro-Angiogenic Activity of Multiple Myeloma Cells
Source: PubMed Central journal article supplement (PMC7565520; doi:10.3390/cancers12092600), 2020-09-11
Supplement: cancers-12-02600-s001.pdf [file cancers-12-02600-s001.pdf]

# **Supplementary Materials: Jagged Ligands Enhance the Pro-Angiogenic Activity of Multiple Myeloma Cells**

**Maria Teresa Palano, Domenica Giannandrea, Natalia Platonova, Germano Gaudenzi, Monica Falleni, Delfina Tosi, Elena Lesma, Valentina Citro, Michela Colombo, Iaria Saltarella, Roberto Ria, Nicola Amodio, Elisa Taiana, Antonino Neri, Giovanni Vitale and Raffaella Chiaramonte**

**Table 1.** Correlation matrix of markers for ligand and target gene of Notch pathway and angiogenesis quantified in MM patients' BM biopsies.

| Pearson Correlation Analysis |                 | MM Stage | JAGGE D1 NM | JAGGE D1 M | JAGGE D2 NM | JAGGED2 M | HES6 N M | HES6 M  | VEGF-ANM | VEGF-A M | MVD     |
|------------------------------|-----------------|----------|-------------|------------|-------------|-----------|----------|---------|----------|----------|---------|
| MM stage                     | coefficient r   |          | 0.7533      | 0.6970     | 0.8280      | 0.7316    | 0.7461   | 0.7839  | 0.8920   | 0.8734   | 0,8787  |
|                              | <i>p</i> -value |          | <0.0001     | <0.0001    | <0.0001     | <0.0001   | <0.0001  | <0.0001 | <0.0001  | <0.0001  | <0.0001 |
| JAGGED1 NM                   | coefficient r   | 0.7533   |             | 0.6972     | 0.7360      | 0.6012    | 0.7223   | 0.6822  | 0.7511   | 0.7519   | 0,7169  |
|                              | <i>p</i> -value | <0.0001  |             | <0.0001    | <0.0001     | 0.0002    | <0.0001  | <0.0001 | <0.0001  | <0.0001  | <0.0001 |
| JAGGED1 M                    | coefficient r   | 0.6970   | 0.6972      |            | 0.6926      | 0.4797    | 0.5673   | 0.7046  | 0.6287   | 0.6845   | 0,7424  |
|                              | <i>p</i> -value | <0.0001  | <0.0001     |            | <0.0001     | 0.0041    | 0.0005   | <0.0001 | 0.0001   | <0.0001  | <0.0001 |
| JAGGED2 NM                   | coefficient r   | 0.8280   | 0.7360      | 0.6926     |             | 0.7677    | 0.6498   | 0.7661  | 0.8012   | 0.8117   | 0,8564  |
|                              | <i>p</i> -value | <0.0001  | <0.0001     | <0.0001    |             | <0.0001   | <0.0001  | <0.0001 | <0.0001  | <0.0001  | <0.0001 |
| JAGGED2 M                    | coefficient r   | 0.7316   | 0.6012      | 0.4797     | 0.7677      |           | 0.5516   | 0.8048  | 0.6233   | 0.6443   | 0,7368  |
|                              | <i>p</i> -value | <0.0001  | 0.0002      | 0.0041     | <0.0001     |           | 0.0007   | <0.0001 | 0.0001   | <0.0001  | <0.0001 |
| HES6NM                       | coefficient r   | 0.7461   | 0.7223      | 0.5673     | 0.6498      | 0.5516    |          | 0.6439  | 0.6057   | 0.5956   | 0,7020  |
|                              | <i>p</i> -value | <0.0001  | <0.0001     | 0.0005     | <0.0001     | 0.0007    |          | 0.0001  | 0.0001   | 0.0002   | <0.0001 |
| HES6 M                       | coefficient r   | 0.7839   | 0.6822      | 0.7046     | 0.7661      | 0.8048    | 0.6439   |         | 0.6745   | 0.6687   | 0,8829  |
|                              | <i>p</i> -value | <0.0001  | <0.0001     | <0.0001    | <0.0001     | <0.0001   | 0.0001   |         | <0.0001  | <0.0001  | <0.0001 |
| VEGF-A NM                    | coefficient r   | 0.8920   | 0.7511      | 0.6287     | 0.8012      | 0.6233    | 0.6057   | 0.6745  |          | 0.7989   | 0,8260  |
|                              | <i>p</i> -value | <0.0001  | <0.0001     | 0.0001     | <0.0001     | 0.0001    | 0.0001   | <0.0001 |          | <0.0001  | <0.0001 |
| VEGF-A M                     | coefficient r   | 0.8734   | 0.7519      | 0.6845     | 0.8117      | 0.6443    | 0.5956   | 0.6687  | 0.7989   |          | 0,7681  |
|                              | <i>p</i> -value | <0.0001  | <0.0001     | <0.0001    | <0.0001     | <0.0001   | <0.0001  | <0.0001 | <0.0001  |          | <0.0001 |
| MVD                          | coefficient r   | 0.8787   | 0.7169      | 0.7424     | 0.8564      | 0.7368    | 0.7020   | 0.8829  | 0.8260   | 0.7681   |         |
|                              | <i>p</i> -value | <0.0001  | <0.0001     | <0.0001    | <0.0001     | <0.0001   | <0.0001  | <0.0001 | <0.0001  | <0.0001  |         |

Table S1: Correlation matrix of markers for ligand and target gene of Notch pathway and angiogenesis quantified in MM patients' BM biopsies. 34 BMPs from MM patients were analyzed at the onset of the disease prior to drug treatments. Quantified parameters were used for a Pearson correlation analysis using GraphPad Prism 6. Statistical analysis was carried out using two-tailed *t*-test. Table shows a correlation matrix with coefficient *r* and *p*-value.

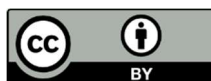

© 2020 by the authors. Licensee MDPI, Basel, Switzerland. This article is an open access article distributed under the terms and conditions of the Creative Commons Attribution (CC BY) license (<http://creativecommons.org/licenses/by/4.0/>).
